# Supplementary material for: Effect of High-Titer Convalescent Plasma on Progression to Severe Respiratory Failure or Death in Hospitalized Patients With COVID-19 Pneumonia: A Randomized Clinical Trial
Source: PubMed Central journal article supplement (PMC8630572; doi:10.1001/jamanetworkopen.2021.36246), 2021-11-29
Supplement: jamanetwopen-e2136246-s003.pdf [file jamanetwopen-e2136246-s003.pdf]

\*Indicates required information. Only first name, last name, and suffix will appear in PubMed.

| <b>*Group Name(s): TSUNAMI Study group</b> |                     |                              |                  |                                                                                                                                         |                                          |                                                         |                                                                                            |  |
|--------------------------------------------|---------------------|------------------------------|------------------|-----------------------------------------------------------------------------------------------------------------------------------------|------------------------------------------|---------------------------------------------------------|--------------------------------------------------------------------------------------------|--|
| <b>*First Name and Middle Initial(s)</b>   | <b>*Last Name</b>   | <b>*Suffix (eg, Jr, III)</b> | Academic Degrees | Institution                                                                                                                             | Location (city, state/province, country) | Role or Contribution, eg, chair, principal investigator | Group (if more than 1 Group listed in the byline) and/or Subgroup (eg, Steering Committee) |  |
| Roberto Salvatore                          | Palazzolo<br>Casari |                              | MD               | Asst Valtellina e Alto Lario, Sondrio                                                                                                   | Sondrio, Italy                           | investigator                                            | TSUNAMI Study Group                                                                        |  |
| Alessandro                                 | Occhionero          |                              | MD               | Carlo Poma Hospital                                                                                                                     | Mantova, Italy                           | investigator                                            | TSUNAMI Study Group                                                                        |  |
| Tiziana                                    | Grazzini            |                              | MD               | Azienda Ospedaliera Universitaria Pisana                                                                                                | Pisa, Italy                              | assistant                                               | TSUNAMI Study Group                                                                        |  |
| Dina Leonarda                              | Silvestri           |                              | MD               | Azienda Ospedaliera Universitaria Pisana                                                                                                | Pisa, Italy                              | assistant                                               | TSUNAMI Study Group                                                                        |  |
| Mariacarla                                 | Iorio               |                              | MD               | Azienda Ospedaliera Universitaria Pisana                                                                                                | Pisa, Italy                              | assistant                                               | TSUNAMI Study Group                                                                        |  |
| Andrea                                     | Tosti               |                              | MD               | Department of Medicine, Clinic of Infectious Diseases, "Santa Maria della Misericordia" Hospital, University of Perugia                 | Perugia, Italy                           | investigator                                            | TSUNAMI Study Group                                                                        |  |
| Daniela                                    | Francisci           |                              | MD               | Department of Medicine, Clinic of Infectious Diseases, "Santa Maria della Misericordia" Hospital, University of Perugia                 | Perugia, Italy                           | investigator                                            | TSUNAMI Study Group                                                                        |  |
| Cecilia                                    | Becattini           |                              | MD               | Internal and Cardiovascular Medicine-Stroke Unit, University of Perugia                                                                 | Perugia, Italy                           | investigator                                            | TSUNAMI Study Group                                                                        |  |
| Matteo                                     | Pirro               |                              | MD               | Unit of Internal Medicine, Department of Medicine, University of Perugia,                                                               | Perugia, Italy                           | investigator                                            | TSUNAMI Study Group                                                                        |  |
| Mauro                                      | Marchesi            |                              | MD               | Centro Regionale Sangue, Servizio Immunotrasfusionale, Azienda Ospedaliera di Perugia                                                   | Perugia, Italy                           | assistant                                               | TSUNAMI Study Group                                                                        |  |
| Sabrina                                    | Bastianelli         |                              | MD               | Department of Medicine, Clinic of Infectious Diseases, "Santa Maria della Misericordia" Hospital, University of Perugia                 | Perugia, Italy                           | investigator                                            | TSUNAMI Study Group                                                                        |  |
| Sara                                       | Pierucci            |                              | MD               | Department of Medicine, Clinic of Infectious Diseases, "Santa Maria della Misericordia" Hospital, University of Perugia                 | Perugia, Italy                           | investigator                                            | TSUNAMI Study Group                                                                        |  |
| Chiara                                     | Busti               |                              | MD               | Department of Medicine, Clinic of Infectious Diseases, "Santa Maria della Misericordia" Hospital, University of Perugia                 | Perugia, Italy                           | investigator                                            | TSUNAMI Study Group                                                                        |  |
| Antonella                                  | Mencacci            |                              | MD               | Microbiology and Clinical Microbiology, Department of Medicine and Surgery, University of Perugia                                       | Perugia, Italy                           | assistant                                               | TSUNAMI Study Group                                                                        |  |
| Silvia                                     | Bozza               |                              | MD               | Microbiology and Clinical Microbiology, Department of Medicine and Surgery, University of Perugia                                       | Perugia, Italy                           | assistant                                               | TSUNAMI Study Group                                                                        |  |
| Barbara                                    | Camilloni           |                              | MD               | Microbiology and Clinical Microbiology, Department of Medicine and Surgery, University of Perugia                                       | Perugia, Italy                           | assistant                                               | TSUNAMI Study Group                                                                        |  |
| Valentina                                  | Annoni              |                              | MD               | Viareggio Hospital                                                                                                                      | Viareggio, Italy                         | investigator                                            | TSUNAMI Study Group                                                                        |  |
| Chiara                                     | Bellotto            |                              | MD               | Viareggio Hospital                                                                                                                      | Viareggio, Italy                         | investigator                                            | TSUNAMI Study Group                                                                        |  |
| Adriano                                    | Cioppi              |                              | MD               | Viareggio Hospital                                                                                                                      | Viareggio, Italy                         | investigator                                            | TSUNAMI Study Group                                                                        |  |
| Giorgia                                    | Querci              |                              | MD               | Viareggio Hospital                                                                                                                      | Viareggio, Italy                         | investigator                                            | TSUNAMI Study Group                                                                        |  |
| Giacomo                                    | Ciusa               |                              | MD               | Infectious Diseases Unit, Azienda Ospedaliero-Universitaria di Modena                                                                   | Modena, Italy                            | investigator                                            | TSUNAMI Study Group                                                                        |  |
| Michela                                    | Tassara             |                              | MD               | Immunohematology and Transfusion Medicine, IRCCS Ospedale San Raffaele, Milan                                                           | Milan, Italy                             | assistant                                               | TSUNAMI Study Group                                                                        |  |
| Anna                                       | Danise              |                              | MD               | Infectious Diseases, IRCCS Ospedale San Raffaele, Università Vita-Salute San Raffaele, Milan                                            | Milan, Italy                             | investigator                                            | TSUNAMI Study Group                                                                        |  |
| Silvia                                     | Chigiotti           |                              | MD               | Division of Infectious Diseases, Hospital of Grosseto                                                                                   | Grosseto, Italy                          | investigator                                            | TSUNAMI Study Group                                                                        |  |
| Giovanna                                   | Morelli             |                              | MD               | Infectious Disease Unit, Hospital of Lucca                                                                                              | Lucca, Italy                             | investigator                                            | TSUNAMI Study Group                                                                        |  |
| Micaela                                    | Meini               |                              | MD               | Infectious Disease Unit, Hospital of Lucca                                                                                              | Lucca, Italy                             | investigator                                            | TSUNAMI Study Group                                                                        |  |
| Valentina                                  | Golfo               |                              | MD               | Infectious Disease Unit, Department of Clinical and Experimental Medicine, Azienda Ospedaliera Universitaria Pisana, University of Pisa | Pisa, Italy                              | investigator                                            | TSUNAMI Study Group                                                                        |  |
| Simone                                     | Ferranti            |                              | MD               | Infectious Disease Unit, Azienda Ospedaliera Universitaria Pisana                                                                       | Pisa, Italy                              | investigator                                            | TSUNAMI Study Group                                                                        |  |
| Enrico                                     | Tagliaferri         |                              | MD               | Infectious Disease Unit, Azienda Ospedaliera Universitaria Pisana                                                                       | Pisa, Italy                              | investigator                                            | TSUNAMI Study Group                                                                        |  |
| Riccardo                                   | Iapoce              |                              | MD               | Infectious Disease Unit, Azienda Ospedaliera Universitaria Pisana                                                                       | Pisa, Italy                              | investigator                                            | TSUNAMI Study Group                                                                        |  |
| Chiara                                     | Barbieri            |                              | PhD              | Infectious Disease Unit, Department of Clinical and Experimental Medicine, Azienda Ospedaliera Universitaria Pisana, University of Pisa | Pisa, Italy                              | investigator                                            | TSUNAMI Study Group                                                                        |  |

\*Indicates required information. Only first name, last name, and suffix will appear in PubMed.

| *First Name and Middle Initial(s) | *Last Name       | *Suffix (eg, Jr, III) | Academic Degrees | Institution                                                                                                                             | Location (city, state/province, country) | Role or Contribution, eg, chair, principal investigator | Group (if more than 1 Group listed in the byline) and/or Subgroup (eg, Steering Committee) |
|-----------------------------------|------------------|-----------------------|------------------|-----------------------------------------------------------------------------------------------------------------------------------------|------------------------------------------|---------------------------------------------------------|--------------------------------------------------------------------------------------------|
| Arianna                           | Forniti          |                       | MD               | Infectious Disease Unit, Department of Clinical and Experimental Medicine, Azienda Ospedaliera Universitaria Pisana, University of Pisa | Pisa, Italy                              | investigator                                            | TSUNAMI Study Group                                                                        |
| Claudio                           | Caroselli        |                       | MD               | Infectious Disease Unit, Department of Clinical and Experimental Medicine, Azienda Ospedaliera Universitaria Pisana, University of Pisa | Pisa, Italy                              | investigator                                            | TSUNAMI Study Group                                                                        |
| Stefano                           | Verdenelli       |                       | MD               | Infectious Disease Unit, Azienda Ospedaliera Universitaria Pisana                                                                       | Pisa, Italy                              | investigator                                            | TSUNAMI Study Group                                                                        |
| Fabio                             | Monzani          |                       | MD               | Geriatric Unit, Azienda Ospedaliera Universitaria Pisana                                                                                | Pisa, Italy                              | investigator                                            | TSUNAMI Study Group                                                                        |
| Paola                             | Mazzetti         |                       | MD               | Division of Virology, Pisa University Hospital                                                                                          | Pisa, Italy                              | assistant                                               | TSUNAMI Study Group                                                                        |
| Giovanna                          | Moscato          |                       | MD               | Division of Laboratory Analysis, Pisa University Hospital                                                                               | Pisa, Italy                              | assistant                                               | TSUNAMI Study Group                                                                        |
| Francesco                         | Barchiesi        |                       | MD               | Infectious Diseases Unit, Pesaro Hospital                                                                                               | Pesaro, Italy                            | investigator                                            | TSUNAMI Study Group                                                                        |
| Mauro                             | Andreotti        |                       | MSC              | National Center for Global Health, Istituto Superiore di Sanità                                                                         | Rome, Italy                              | Scientific investigator                                 | TSUNAMI Study Group                                                                        |
| Fausto                            | Baldanti         |                       | MD               | Laboratory of Virology and Microbiology, San Matteo Hospita                                                                             | Pavia, Italy                             | Senior scientific investigator                          | TSUNAMI Study Group                                                                        |
| Andrea                            | Binelli          |                       | MSC              | National Center for Global Health, Istituto Superiore di Sanità                                                                         | Rome, Italy                              | Scientific investigator                                 | TSUNAMI Study Group                                                                        |
| Maria R                           | Capobianchi      |                       | MD, PhD          | Laboratory of Virology, Istituto Nazionale per le Malattie Infettive (INMI) "L. Spallanzani"                                            | Rome, Italy                              | Senior scientific investigator                          | TSUNAMI Study Group                                                                        |
| Roberto                           | Da Cas           |                       | CSC              | National Center for Drug Research and Evaluation, Istituto Superiore di Sanità                                                          | Rome, Italy                              | Scientific investigator                                 | TSUNAMI Study Group                                                                        |
| Daniela                           | Di Sevo          |                       | MSC              | Gimema Foundation                                                                                                                       | Rome, Italy                              | Clinical monitor                                        | TSUNAMI Study Group                                                                        |
| Paola                             | Fazi             |                       | MD PhD           | Gimema Foundation                                                                                                                       | Rome, Italy                              | GIMEMA Data Center Director                             | TSUNAMI Study Group                                                                        |
| Cinzia                            | Gasparrini       |                       | Secretary        | Department of Neuroscience, Istituto Superiore di Sanità                                                                                | Rome, Italy                              | Assistant                                               | TSUNAMI Study Group                                                                        |
| Ilaria                            | Ippoliti         |                       | MSC              | National Center for Drug Research and Evaluation, Istituto Superiore di Sanità                                                          | Rome, Italy                              | Scientific                                              | TSUNAMI Study Group                                                                        |
| Alessandra                        | Mancino          |                       | MSC              | Gimema Foundation                                                                                                                       | Rome, Italy                              | Scientific project manager                              | TSUNAMI Study Group                                                                        |
| Francesca                         | Menniti Ippolito |                       | PhD              | National Center for Drug Research and Evaluation, Istituto Superiore di Sanità                                                          | Rome, Italy                              | Senior Scientific investigator                          | TSUNAMI Study Group                                                                        |
| Francesca                         | Paoloni          |                       | Statistician     | Gimema Foundation                                                                                                                       | Rome, Italy                              | Data Base project manager                               | TSUNAMI Study Group                                                                        |
| Paola                             | Ruggeri          |                       | Secretary        | National Center for Drug Research and Evaluation, Istituto Superiore di Sanità                                                          | Rome, Italy                              | Assistant                                               | TSUNAMI Study Group                                                                        |
| Arianna                           | Rughini          |                       | MSC              | Gimema Foundation                                                                                                                       | Rome, Italy                              | Clinical monitor                                        | TSUNAMI Study Group                                                                        |
| Emanuela                          | Salvi            |                       | Secretary        | National Center for Drug Research and Evaluation, Istituto Superiore di Sanità                                                          | Rome, Italy                              | Assistant                                               | TSUNAMI Study Group                                                                        |
| Valeria                           | Sargentini       |                       | PhD              | Gimema Foundation                                                                                                                       | Rome, Italy                              | Data manager                                            | TSUNAMI Study Group                                                                        |
| Maria P                           | Trotta           |                       | MD               | Agenzia Italiana del Farmaco                                                                                                            | Rome, Italy                              | Advisor                                                 | TSUNAMI Study Group                                                                        |
| Marco                             | Vignetti         |                       | MD               | Gimema Foundation                                                                                                                       | Rome, Italy                              | Advisor                                                 | TSUNAMI Study Group                                                                        |
