# Supplementary material for: Effect of High-Titer Convalescent Plasma on Progression to Severe Respiratory Failure or Death in Hospitalized Patients With COVID-19 Pneumonia: A Randomized Clinical Trial
Source: PubMed Central journal article supplement (PMC8630572; doi:10.1001/jamanetworkopen.2021.36246), 2021-11-29
Supplement: jamanetwopen-e2136246-s004.pdf [file jamanetwopen-e2136246-s004.pdf]

## Data Sharing Statement

Menichetti. Effect of High-Titer Convalescent Plasma on Progression to Severe Respiratory Failure or Death in Hospitalized Patients With COVID-19 Pneumonia. *JAMA Netw Open*. Published November 29, 2021. doi:10.1001/jamanetworkopen.2021.36246

### Data

**Data available:** Yes

**Data types:** Deidentified participant data

**How to access data:** Database available from GIMEMA

**When available:** With publication

### Supporting Documents

**Document types:** Statistical/analytic code

**How to access documents:** Documents available from GIMEMA

**When available:** With publication

### Additional Information

**Who can access the data:** researchers whose proposed use of the data has been approved

**Types of analyses:** for a specified purpose

**Mechanisms of data availability:** after approval of a proposal and with a signed data access agreement
